# Supplementary material for: ClassifyCNV: a tool for clinical annotation of copy-number variants
Source: PubMed Central journal article supplement (PMC7683568; doi:10.1038/s41598-020-76425-3), 2020-11-23
Supplement: 41598_2020_76425_MOESM1_ESM.pdf [file 41598_2020_76425_MOESM1_ESM.pdf]

## ClassifyCNV: a tool for clinical annotation of copy-number variants

Tatiana A. Gurbich and Valery Vladimirovich Ilinsky

Supplementary Information

Supplementary Table S1. Databases used by ClassifyCNV.

| Database                 | Genome build | Sections of the Copy Number Loss rubric where the database is used | Sections of the Copy Number Gain rubric where the database is used | Links and citations                                                                                                                                                                                                                                                                                                                                                                                                                                                                                                   | Comment                                                                                                                                                                                                           |
|--------------------------|--------------|--------------------------------------------------------------------|--------------------------------------------------------------------|-----------------------------------------------------------------------------------------------------------------------------------------------------------------------------------------------------------------------------------------------------------------------------------------------------------------------------------------------------------------------------------------------------------------------------------------------------------------------------------------------------------------------|-------------------------------------------------------------------------------------------------------------------------------------------------------------------------------------------------------------------|
| RefGene                  | hg19, hg38   | 1, 3, 2E                                                           | 1, 3, 2D, 2E, 2F, 2G                                               | <a href="http://hgdownload.cse.ucsc.edu/goldenPath/hg19/database/refGene.txt.gz">http://hgdownload.cse.ucsc.edu/goldenPath/hg19/database/refGene.txt.gz</a><br><a href="http://hgdownload.cse.ucsc.edu/goldenPath/hg38/database/refGene.txt.gz">http://hgdownload.cse.ucsc.edu/goldenPath/hg38/database/refGene.txt.gz</a><br>(O'Leary et al., 2016) <sup>1</sup>                                                                                                                                                     | Only one transcript per gene was kept. A MANE Select transcript was used if available. Otherwise, the longest transcript was used.                                                                                |
| Promoters                | hg19, hg38   | 1                                                                  | 1                                                                  | -                                                                                                                                                                                                                                                                                                                                                                                                                                                                                                                     | The promoter database was generated by obtaining the coordinates of the 500bp region directly upstream of every gene in the refGene database.                                                                     |
| VISTA enhancers          | hg19         | 1                                                                  | 1                                                                  | <a href="https://enhancer.lbl.gov/cgi-bin/imagedb3.pl?page_size=10((0;show=1;search.result=yes;page=1;form=search;search.form=no;action=search;search.sequence=1">https://enhancer.lbl.gov/cgi-bin/imagedb3.pl?page_size=10((0;show=1;search.result=yes;page=1;form=search;search.form=no;action=search;search.sequence=1</a><br>(Visel et al., 2007) <sup>2</sup>                                                                                                                                                    | The database was pre-parsed to only keep human enhancers.<br><br>This database is combined with FANTOM5 enhancers and enhancers from the Ensembl regulatory build to make the Enhancers.3sources.merged.bed file. |
| FANTOM5 enhancers        | hg19, hg38   | 1                                                                  | 1                                                                  | <a href="https://fantom.gsc.riken.jp/5/datafiles/latest/extra/Enhancers/human_permissive_enhancers_phase_1_and_2.bed.gz">https://fantom.gsc.riken.jp/5/datafiles/latest/extra/Enhancers/human_permissive_enhancers_phase_1_and_2.bed.gz</a><br><a href="https://fantom.gsc.riken.jp/5/datafiles/reprocessed/hg38_latest/extra/enhancer/F5.hg38.enhancers.bed.gz">https://fantom.gsc.riken.jp/5/datafiles/reprocessed/hg38_latest/extra/enhancer/F5.hg38.enhancers.bed.gz</a><br>(Andersson et al., 2014) <sup>3</sup> | This database is combined with VISTA enhancers and enhancers from the Ensembl regulatory build to make the Enhancers.3sources.merged.bed file.                                                                    |
| Ensembl regulatory build | hg38         | 1                                                                  | 1                                                                  | <a href="ftp://ftp.ensembl.org/pub/release-100/regulation/homo_sapiens/homo_sapiens.GRCh38.Regulatory_Build.regulatory_features.20190329.gff.gz">ftp://ftp.ensembl.org/pub/release-100/regulation/homo_sapiens/homo_sapiens.GRCh38.Regulatory_Build.regulatory_features.20190329.gff.gz</a><br>(Zerbino et al., 2015) <sup>4</sup>                                                                                                                                                                                    | Only enhancers were extracted from the database.<br><br>This database is combined with VISTA enhancers and FANTOM5 enhancers to make the Enhancers.3sources.merged.bed file.                                      |

|                                                                         |            |            |       |                                                                                                                                                                                                                                                                                                                                                  |                                                                                                                                                               |
|-------------------------------------------------------------------------|------------|------------|-------|--------------------------------------------------------------------------------------------------------------------------------------------------------------------------------------------------------------------------------------------------------------------------------------------------------------------------------------------------|---------------------------------------------------------------------------------------------------------------------------------------------------------------|
| refGene gene features (5'UTR, 3'UTR, exons, cds)                        | hg19, hg38 | 2C, 2D, 2E | 2E    | <a href="http://genome.ucsc.edu/cgi-bin/hgTables">http://genome.ucsc.edu/cgi-bin/hgTables</a><br><br>(Kuhn et al., 2013) <sup>5</sup>                                                                                                                                                                                                            | Gene feature coordinates were obtained for protein-coding genes. Only one transcript per gene was used (MANE Select if available, the longest one otherwise). |
| ClinGen haploinsufficient and triplosensitive genes and curated regions | hg19, hg38 | 2A-2G      | 2A-2H | <a href="ftp://ftp.clinicalgenome.org/">ftp://ftp.clinicalgenome.org/</a><br><br>(Rehm et al., 2015) <sup>6</sup>                                                                                                                                                                                                                                | The script that downloads and parses the databases (update_clingen.sh) is included in the repository.                                                         |
| DECIPHER HI Predictions Version3                                        | hg38       | 2H         |       | <a href="https://decipher.sanger.ac.uk/files/downloads/HI_Predictions_Version3.bed.gz">https://decipher.sanger.ac.uk/files/downloads/HI_Predictions_Version3.bed.gz</a><br><br>(Firth et al., 2009) <sup>7</sup>                                                                                                                                 |                                                                                                                                                               |
| ExAC pLI scores                                                         | hg19       | 2H         |       | <a href="ftp://ftp.broadinstitute.org/pub/ExAC_release/release1/manuscript_data/forweb_cleaned_exac_r03_march16_z_data_pLI.txt.gz">ftp://ftp.broadinstitute.org/pub/ExAC_release/release1/manuscript_data/forweb_cleaned_exac_r03_march16_z_data_pLI.txt.gz</a><br><br>(Lek et al., 2016) <sup>8</sup>                                           |                                                                                                                                                               |
| the pLoF observed/expected upper fraction (LOEUF)                       | hg19       | 2H         |       | <a href="gs://gnomad-public/release/2.1.1/constraint/gnomad.v2.1.1.lof_metrics.by_gene.txt.bgz">gs://gnomad-public/release/2.1.1/constraint/gnomad.v2.1.1.lof_metrics.by_gene.txt.bgz</a><br><br>(Collins et al., 2020) <sup>9</sup>                                                                                                             |                                                                                                                                                               |
| DGV Gold Standard Variants (2016-05-15)                                 | hg19, hg38 | 4O         | 4O    | <a href="http://dgv.tcag.ca/dgv/docs/DGV.GS.March2016.50percent.GainLossSep.Final.hg19.gff3">http://dgv.tcag.ca/dgv/docs/DGV.GS.March2016.50percent.GainLossSep.Final.hg19.gff3</a><br><br><a href="http://dgv.tcag.ca/dgv/docs/DGV.GS.hg38.gff3">http://dgv.tcag.ca/dgv/docs/DGV.GS.hg38.gff3</a><br><br>(MacDonald et al., 2014) <sup>10</sup> | Included in population_freqs.bed                                                                                                                              |
| gnomAD structural variant frequencies                                   | hg19       | 4O         | 4O    | <a href="https://storage.googleapis.com/gnomad-public/papers/2019-sv/gnomad_v2.1_sv_sites.bed.gz">https://storage.googleapis.com/gnomad-public/papers/2019-sv/gnomad_v2.1_sv_sites.bed.gz</a><br><br>(Collins et al., 2020) <sup>9</sup>                                                                                                         | Included in population_freqs.bed                                                                                                                              |

Supplementary Table S2. Implementation of the ACMG/ClinGen Copy Number Loss rubric.

**Section 1: Initial assessment of genomic content**

| Evidence type            | Evidence                                                                                 | The number of points suggested by the ACMG/Clingen guidelines | The number of points ClassifyCNV assigns if the condition is satisfied | Implementation |
|--------------------------|------------------------------------------------------------------------------------------|---------------------------------------------------------------|------------------------------------------------------------------------|----------------|
| Copy-number loss content | <b>1A.</b> Contains protein-coding or other known functionally important elements.       | 0                                                             | 0                                                                      | Implemented    |
|                          | <b>1B.</b> Does NOT contain protein-coding or any known functionally important elements. | -0.60                                                         | -0.60                                                                  | Implemented    |

**Section 2: Overlap with established/predicted haploinsufficiency (HI) or established benign genes/genomic regions (Skip to section 3 if your copy-number loss DOES NOT overlap these types of genes/regions)**

|                                                                                               |                                                                                                                                                                                                                                                                                                                                                                                                                                     |                            |                      |             |
|-----------------------------------------------------------------------------------------------|-------------------------------------------------------------------------------------------------------------------------------------------------------------------------------------------------------------------------------------------------------------------------------------------------------------------------------------------------------------------------------------------------------------------------------------|----------------------------|----------------------|-------------|
| Overlap with ESTABLISHED HI genes or genomic regions and consideration of reason for referral | <b>2A.</b> Complete overlap of an established HI gene/genomic region.                                                                                                                                                                                                                                                                                                                                                               | 1                          | 1                    | Implemented |
|                                                                                               | <b>2B.</b> Partial overlap of an established HI genomic region<br><ul style="list-style-type: none"> <li>• The observed CNV does NOT contain the known causative gene or critical region for this established HI genomic region OR</li> <li>• Unclear if known causative gene or critical region is affected OR</li> <li>• No specific causative gene or critical region has been established for this HI genomic region</li> </ul> | 0                          | 0                    | Implemented |
|                                                                                               | <b>2C.</b> Partial overlap with the 5' end of an established HI gene (3' end of the gene not involved)...                                                                                                                                                                                                                                                                                                                           |                            | See categories below |             |
|                                                                                               | <b>2C-1.</b> ...and coding sequence is involved                                                                                                                                                                                                                                                                                                                                                                                     | 0.90 (Range: 0.45 to 1.00) | 0.90                 | Implemented |
|                                                                                               | <b>2C-2.</b> ...and only the 5' UTR is involved                                                                                                                                                                                                                                                                                                                                                                                     | 0 (Range: 0 to 0.45)       | 0                    | Implemented |

|  |                                                                                                                               |                                                                                                                                                                                                                                                                                                                                                                                        |                                                                                                                     |                                                                                                                                                                                                                                                                                                  |
|--|-------------------------------------------------------------------------------------------------------------------------------|----------------------------------------------------------------------------------------------------------------------------------------------------------------------------------------------------------------------------------------------------------------------------------------------------------------------------------------------------------------------------------------|---------------------------------------------------------------------------------------------------------------------|--------------------------------------------------------------------------------------------------------------------------------------------------------------------------------------------------------------------------------------------------------------------------------------------------|
|  | <b>2D.</b> Partial overlap with the 3' end of an established HI gene (5' end of the gene not involved)...                     |                                                                                                                                                                                                                                                                                                                                                                                        | See categories below                                                                                                |                                                                                                                                                                                                                                                                                                  |
|  | <b>2D-1.</b> ...and only the 3' untranslated region is involved.                                                              | 0                                                                                                                                                                                                                                                                                                                                                                                      | 0                                                                                                                   | Implemented                                                                                                                                                                                                                                                                                      |
|  | <b>2D-2.</b> ...and only the last exon is involved. Other established pathogenic variants have been reported in this exon.    | 0.90 (Range: 0.45 to 0.90)                                                                                                                                                                                                                                                                                                                                                             | 0.30                                                                                                                | Partially implemented.<br><br>0.30 points are assigned in all cases where only the last exon is involved regardless of whether there are established pathogenic variants in this exon.                                                                                                           |
|  | <b>2D-3.</b> ...and only the last exon is involved. No other established pathogenic variants have been reported in this exon. | 0.30 (Range: 0 to 0.45)                                                                                                                                                                                                                                                                                                                                                                | 0.30                                                                                                                |                                                                                                                                                                                                                                                                                                  |
|  | <b>2D-4.</b> ...and it includes other exons in addition to the last exon. Nonsense-mediated decay is expected to occur.       | 0.90 (Range: 0.45 to 1.00)                                                                                                                                                                                                                                                                                                                                                             | 0.90                                                                                                                | Implemented                                                                                                                                                                                                                                                                                      |
|  | <b>2E.</b> Both breakpoints are within the same gene (intragenic CNV; gene-level sequence variant).                           | See ClinGen SVI working group PVS1 specifications<br><ul style="list-style-type: none"> <li>• PVS1 = 0.90 (Range: 0.45 to 0.90)</li> <li>• PVS1_Strong = 0.45 (Range: 0.30 to 0.90)</li> <li>• PVS1_Moderate or PM4 (in-frame indels) = 0.30 (Range: 0.15 to 0.45)</li> <li>• PVS1_Supporting = 0.15 (Range: 0 to 0.30)</li> <li>• N/A = No points, but continue evaluation</li> </ul> | <ul style="list-style-type: none"> <li>• PVS1 = 0.90</li> <li>• N/A = No points, but continue evaluation</li> </ul> | Partially implemented.<br><br>If the --precise flag is on, points are assigned for intragenic variants in biologically-relevant transcripts that disrupt the reading frame and are predicted to lead to nonsense-mediated decay. No points are assigned for other types of intragenic deletions. |
|  | <b>2F.</b> Completely contained within an established benign CNV region.                                                      | -1                                                                                                                                                                                                                                                                                                                                                                                     | -1                                                                                                                  | Implemented                                                                                                                                                                                                                                                                                      |
|  | <b>2G.</b> Overlaps an established benign CNV, but includes additional genomic material.                                      | 0                                                                                                                                                                                                                                                                                                                                                                                      | 0                                                                                                                   | Implemented                                                                                                                                                                                                                                                                                      |

|  |                                                                                            |      |      |             |
|--|--------------------------------------------------------------------------------------------|------|------|-------------|
|  | <b>2H.</b> Two or more HI predictors suggest that AT LEAST ONE gene in the interval is HI. | 0.15 | 0.15 | Implemented |
|--|--------------------------------------------------------------------------------------------|------|------|-------------|

**Section 3: Evaluation of gene number**

|                                                                                            |                        |      |      |                                                                                                     |
|--------------------------------------------------------------------------------------------|------------------------|------|------|-----------------------------------------------------------------------------------------------------|
| Number of protein-coding RefSeq genes wholly or partially included in the copy-number loss | <b>3A.</b> 0–24 genes  | 0    | 0    | Implemented (Note: if genes belong to the same gene family, each gene within the family is counted) |
|                                                                                            | <b>3B.</b> 25–34 genes | 0.45 | 0.45 | Implemented (Note: if genes belong to the same gene family, each gene within the family is counted) |
|                                                                                            | <b>3C.</b> 35+ genes   | 0.90 | 0.90 | Implemented (Note: if genes belong to the same gene family, each gene within the family is counted) |

**Section 4: Detailed evaluation of genomic content using cases from published literature, public databases, and/or internal lab data(Skip to section 5 if either your CNV overlapped with an established HI gene/region in section 2, OR there have been no reports associating either the CNV or any genes within the CNV with human phenotypes caused by loss of function [LOF] or copy-number loss)**

|                                                |                                                                                                                                                                                                                                                                                                         |                                                                                                              |   |                 |
|------------------------------------------------|---------------------------------------------------------------------------------------------------------------------------------------------------------------------------------------------------------------------------------------------------------------------------------------------------------|--------------------------------------------------------------------------------------------------------------|---|-----------------|
| Individual case evidence — de novo occurrences | Reported proband (from literature, public databases, or internal lab data) has either:<br>• A complete deletion of or a LOF variant within gene encompassed by the observed copy-number loss OR<br>• An overlapping copy-number loss similar in genomic content to the observed copy-number loss AND... | See categories below                                                                                         |   |                 |
|                                                | <b>4A.</b> ...the reported phenotype is highly specific and relatively unique to the gene or genomic region,                                                                                                                                                                                            | Confirmed de novo: 0.45 points each<br>Assumed de novo: 0.30 points each (range: 0.15 to 0.45). 0.90 (total) | - | Not implemented |
|                                                | <b>4B.</b> ...the reported phenotype is consistent with the gene/genomic region, is highly specific, but not necessarily unique                                                                                                                                                                         | Confirmed de novo: 0.30 points each<br>Assumed de novo: 0.15 point each (range: 0 to 0.45)                   | - | Not implemented |

|                                                                                |                                                                                                                                                                    |                                                                                              |   |                 |
|--------------------------------------------------------------------------------|--------------------------------------------------------------------------------------------------------------------------------------------------------------------|----------------------------------------------------------------------------------------------|---|-----------------|
|                                                                                | to the gene/genomic region.                                                                                                                                        |                                                                                              |   |                 |
|                                                                                | <b>4C.</b> ...the reported phenotype is consistent with the gene/genomic region, but not highly specific and/or with high genetic heterogeneity.                   | Confirmed de novo: 0.15 point each<br>Assumed de novo: 0.10 point each<br>(range: 0 to 0.30) | - | Not implemented |
| Individual case evidence — inconsistent phenotype                              | <b>4D.</b> ...the reported phenotype is NOT consistent with what is expected for the gene/genomic region or not consistent in general.                             | 0 points each<br>(range: 0 to -0.30).<br>-0.30 (total)                                       | - | Not implemented |
| Individual case evidence — unknown inheritance                                 | <b>4E.</b> Reported proband has a highly specific phenotype consistent with the gene/genomic region, but the inheritance of the variant is unknown.                | 0.10 points each<br>(range: 0 to 0.15).<br>0.30 (total)                                      | - | Not implemented |
| Individual case evidence — segregation among similarly affected family members | <b>4F.</b> 3–4 observed segregations                                                                                                                               | 0.15 (0.45 max)                                                                              | - | Not implemented |
|                                                                                | <b>4G.</b> 5–6 observed segregations                                                                                                                               | 0.30                                                                                         | - | Not implemented |
|                                                                                | <b>4H.</b> 7 or more observed segregations                                                                                                                         | 0.45                                                                                         | - | Not implemented |
| Individual case evidence — nonsegregations                                     | <b>4I.</b> Variant is NOT found in another individual in the proband's family AFFECTED with a consistent, specific, well-defined phenotype (no known phenocopies). | -0.45 points per family (range: 0 to -0.45). -0.90 (total)                                   | - | Not implemented |
|                                                                                | <b>4J.</b> Variant IS found in another individual in the proband's family UNAFFECTED with the specific, well-defined phenotype observed in the proband.            | -0.30 points per family (range: 0 to -0.30). -0.90 (total)                                   | - | Not implemented |

|                                      |                                                                                                                                                                        |                                                                |    |                 |
|--------------------------------------|------------------------------------------------------------------------------------------------------------------------------------------------------------------------|----------------------------------------------------------------|----|-----------------|
|                                      | <b>4K.</b> Variant IS found in another individual in the proband's family UNAFFECTED with the nonspecific phenotype observed in the proband.                           | -0.15 points per family (range: 0 to -0.15). -0.30 (total)     | -  | Not implemented |
| Case-control and population evidence | <b>4L.</b> Statistically significant increase amongst observations in cases (with a consistent, specific, well-defined phenotype) compared with controls.              | 0.45 per study (range: 0 to 0.45 per study). 0.45 (total)      | -  | Not implemented |
|                                      | <b>4M.</b> Statistically significant increase amongst observations in cases (without a consistent, nonspecific phenotype OR unknown phenotype) compared with controls. | 0.30 per study (range: 0 to 0.30 per study). 0.45 (total)      | -  | Not implemented |
|                                      | <b>4N.</b> No statistically significant difference between observations in cases and controls.                                                                         | -0.90 (per study) (range: 0 to -0.90 per study). -0.90 (total) | -  | Not implemented |
|                                      | <b>4O.</b> Overlap with common population variation.                                                                                                                   | -1 (range: 0 to -1)                                            | -1 | Implemented     |

**Section 5: Evaluation of inheritance pattern/family history for patient being studied**

|                                        |                                                                                                                                        |                                                                                     |   |                 |
|----------------------------------------|----------------------------------------------------------------------------------------------------------------------------------------|-------------------------------------------------------------------------------------|---|-----------------|
| Observed copy-number loss is de novo   | <b>5A.</b> Use appropriate category from de novo scoring section in section 4.                                                         | Use de novo scoring categories from section 4 (4A-4D) to determine score (0.45 max) | - | Not implemented |
| Observed copy-number loss is inherited | <b>5B.</b> Patient with specific, well-defined phenotype and no family history. CNV is inherited from an apparently unaffected parent. | -0.30 (range: 0 to -0.45)                                                           | - | Not implemented |
|                                        | <b>5C.</b> Patient with nonspecific phenotype and no family history. CNV is inherited from an apparently unaffected parent.            | -0.15 (range: 0 to -0.30)                                                           | - | Not implemented |

|                                             |                                                                                                                                                                            |                                                                                                    |   |                 |
|---------------------------------------------|----------------------------------------------------------------------------------------------------------------------------------------------------------------------------|----------------------------------------------------------------------------------------------------|---|-----------------|
|                                             | <b>5D.</b> CNV segregates with a consistent phenotype observed in the patient's family.                                                                                    | <i>Use segregation scoring categories from section 4 (4F–4H) to determine score (0.45 max)</i>     | - | Not implemented |
| Observed copy-number loss — nonsegregations | <b>5E.</b> <i>Use appropriate category from nonsegregation section in section 4.</i>                                                                                       | <i>Use nonsegregation scoring categories from section 4 (4I–4K) to determine score (–0.45 max)</i> | - | Not implemented |
| Other                                       | <b>5F.</b> Inheritance information is unavailable or uninformative.                                                                                                        | 0                                                                                                  | - | Not implemented |
|                                             | <b>5G.</b> Inheritance information is unavailable or uninformative. The patient phenotype is nonspecific, but is consistent with what has been described in similar cases. | 0.10 (range: 0 to 0.15)                                                                            | - | Not implemented |
|                                             | <b>5H.</b> Inheritance information is unavailable or uninformative. The patient phenotype is highly specific and consistent with what has been described in similar cases. | 0.30 (range: 0 to 0.30)                                                                            | - | Not implemented |

Supplementary Table S3. Implementation of the ACMG/ClinGen Copy Number Gain rubric.

**Section 1: Initial assessment of genomic content**

| Evidence type            | Evidence                                                                                 | The number of points suggested by the ACMG/Clingen guidelines | The number of points ClassifyCNV assigns if the condition is satisfied | Implementation |
|--------------------------|------------------------------------------------------------------------------------------|---------------------------------------------------------------|------------------------------------------------------------------------|----------------|
| Copy-number gain content | <b>1A.</b> Contains protein-coding or other known functionally important elements.       | 0                                                             | 0                                                                      | Implemented    |
|                          | <b>1B.</b> Does NOT contain protein-coding or any known functionally important elements. | -0.60                                                         | -0.60                                                                  | Implemented    |

**Section 2: Overlap with established triplosensitive (TS), haploinsufficient (HI), or benign genes or genomic regions (Skip to section 3 if the copy-number gain DOES NOT overlap these types of genes/regions)**

|                                                                           |                                                                                                                                                                                                                                                                                                                                                                                                                             |    |    |                                                  |
|---------------------------------------------------------------------------|-----------------------------------------------------------------------------------------------------------------------------------------------------------------------------------------------------------------------------------------------------------------------------------------------------------------------------------------------------------------------------------------------------------------------------|----|----|--------------------------------------------------|
| Overlap with ESTABLISHED TS genes or genomic regions                      | <b>2A.</b> Complete overlap; the TS gene or minimal critical region is fully contained within the observed copy-number gain.                                                                                                                                                                                                                                                                                                | 1  | 1  | Implemented                                      |
|                                                                           | <b>2B.</b> Partial overlap of an established TS region<br><ul style="list-style-type: none"> <li>• The observed CNV does NOT contain the known causative gene or critical region for this established TS genomic region OR</li> <li>• Unclear if known causative gene or critical region is affected OR</li> <li>• No specific causative gene or critical region has been established for this TS genomic region</li> </ul> | 0  | 0  | Implemented                                      |
| Overlap with ESTABLISHED benign copy-number gain genes or genomic regions | <b>2C.</b> Identical in gene content to the established benign copy-number gain.                                                                                                                                                                                                                                                                                                                                            | -1 | -1 | Implemented                                      |
|                                                                           | <b>2D.</b> Smaller than established benign copy-number gain, breakpoint(s) does not interrupt protein-                                                                                                                                                                                                                                                                                                                      | -1 | -1 | Implemented (only when the --precise flag is on) |

|                                           |                                                                                                                                                               |                                                                                                                                                                                                                                         |    |                 |
|-------------------------------------------|---------------------------------------------------------------------------------------------------------------------------------------------------------------|-----------------------------------------------------------------------------------------------------------------------------------------------------------------------------------------------------------------------------------------|----|-----------------|
|                                           | coding genes.                                                                                                                                                 |                                                                                                                                                                                                                                         |    |                 |
|                                           | <b>2E.</b> Smaller than established benign copy-number gain, breakpoint(s) potentially interrupts protein-coding gene.                                        | 0                                                                                                                                                                                                                                       | 0  | Implemented     |
|                                           | <b>2F.</b> Larger than known benign copy-number gain, does not include additional protein-coding genes.                                                       | -1 (range: 0 to -1.00)                                                                                                                                                                                                                  | -1 | Implemented     |
|                                           | <b>2G.</b> Overlaps a benign copy-number gain but includes additional genomic material.                                                                       | 0                                                                                                                                                                                                                                       | 0  | Implemented     |
| Overlap with ESTABLISHED HI gene(s)       | <b>2H.</b> HI gene fully contained within observed copy-number gain.                                                                                          | 0                                                                                                                                                                                                                                       | 0  | Implemented     |
| Breakpoint(s) within ESTABLISHED HI genes | <b>2I.</b> Both breakpoints are within the same gene (gene-level sequence variant, possibly resulting in loss of function [LOF]).                             | See ClinGen SVI working group PVS1 specifications<br><ul style="list-style-type: none"> <li>• PVS1 = 0.90 (Range: 0.45 to 0.90)</li> <li>• PVS1_Strong = 0.45 (Range: 0.30 to 0.90)</li> <li>• N/A = 0 (Continue evaluation)</li> </ul> |    | Not implemented |
|                                           | <b>2J.</b> One breakpoint is within an established HI gene, patient's phenotype is either inconsistent with what is expected for LOF of that gene OR unknown. | 0                                                                                                                                                                                                                                       | 0  | Implemented     |
|                                           | <b>2K.</b> One breakpoint is within an established HI gene, patient's phenotype is highly specific and consistent with what is expected for LOF of that gene. | 0.45                                                                                                                                                                                                                                    | -  | Not implemented |
| Breakpoints within other gene(s)          | <b>2L.</b> One or both breakpoints are within gene(s) of no established clinical significance.                                                                | 0                                                                                                                                                                                                                                       | 0  | Implemented     |

**Section 3: Evaluation of gene number**

|                                                                                            |                        |      |      |                                                                                                     |
|--------------------------------------------------------------------------------------------|------------------------|------|------|-----------------------------------------------------------------------------------------------------|
| Number of protein-coding RefSeq genes wholly or partially included in the copy-number gain | <b>3A.</b> 0–34 genes  | 0    | 0    | Implemented (Note: if genes belong to the same gene family, each gene within the family is counted) |
|                                                                                            | <b>3B.</b> 35–49 genes | 0.45 | 0.45 | Implemented (Note: if genes belong to the same gene family, each gene within the family is counted) |
|                                                                                            | <b>3C.</b> 50+ genes   | 0.90 | 0.90 | Implemented (Note: if genes belong to the same gene family, each gene within the family is counted) |

**Section 4: Detailed evaluation of genomic content using cases from published literature, public databases, and/or internal lab data (Note: If there have been no reports associating either the copy-number gain or any of the genes therein with human phenotypes caused by triplosensitivity, skip to section 5)**

|                                                |                                                                                                                                                                                                                                                                                       |                                                                                                              |   |                 |
|------------------------------------------------|---------------------------------------------------------------------------------------------------------------------------------------------------------------------------------------------------------------------------------------------------------------------------------------|--------------------------------------------------------------------------------------------------------------|---|-----------------|
| Individual case evidence — de novo occurrences | Reported proband (from literature, public databases, or internal lab data) has either:<br>• complete duplication of one or more genes within the observed copy-number gain OR<br>• an overlapping copy-number gain similar in genomic content to the observed copy-number gain AND... | See categories below                                                                                         |   |                 |
|                                                | <b>4A.</b> ...the reported phenotype is highly specific and relatively unique to the gene or genomic region.                                                                                                                                                                          | Confirmed de novo: 0.45 points each<br>Assumed de novo: 0.30 points each (range: 0.15 to 0.45). 0.90 (total) | - | Not implemented |
|                                                | <b>4B.</b> ...the reported phenotype is consistent with the gene/genomic region, is highly specific, but not necessarily unique to the gene/genomic region.                                                                                                                           | Confirmed de novo: 0.30 points each<br>Assumed de novo: 0.15 point each (range: 0 to 0.45)                   | - | Not implemented |
|                                                | <b>4C.</b> ...the reported phenotype is consistent with the gene/genomic                                                                                                                                                                                                              | Confirmed de novo: 0.15 point each<br>Assumed de novo: 0.10 point each                                       | - | Not implemented |

|                                                                                |                                                                                                                                                                           |                                                            |   |                 |
|--------------------------------------------------------------------------------|---------------------------------------------------------------------------------------------------------------------------------------------------------------------------|------------------------------------------------------------|---|-----------------|
|                                                                                | region, but not highly specific and/or with high genetic heterogeneity.                                                                                                   | (range: 0 to 0.30)                                         |   |                 |
| Individual case evidence — inconsistent phenotype                              | <b>4D.</b> ...the reported phenotype is NOT consistent with the gene/genomic region or not consistent in general.                                                         | 0 points each (range: 0 to -0.30). -0.30 (total)           | - | Not implemented |
| Individual case evidence — unknown inheritance                                 | <b>4E.</b> Reported proband has a highly specific phenotype consistent with the gene/genomic region, but the inheritance of the variant is unknown.                       | 0.10 points each (range: 0 to 0.15). 0.30 (total)          | - | Not implemented |
| Individual case evidence — segregation among similarly affected family members | <b>4F.</b> 3–4 observed segregations                                                                                                                                      | 0.15 (0.45 max)                                            | - | Not implemented |
|                                                                                | <b>4G.</b> 5–6 observed segregations                                                                                                                                      | 0.30                                                       | - | Not implemented |
|                                                                                | <b>4H.</b> 7 or more observed segregations                                                                                                                                | 0.45                                                       | - | Not implemented |
| Individual case evidence — nonsegregations                                     | <b>4I.</b> Variant is NOT found in another individual in the proband's family <b>AFFECTED</b> with a consistent, specific, well-defined phenotype (no known phenocopies). | -0.45 points per family (range: 0 to -0.45). -0.90 (total) | - | Not implemented |
|                                                                                | <b>4J.</b> Variant IS found in another individual in the proband's family <b>UNAFFECTED</b> with the specific, well-defined phenotype observed in the proband.            | -0.30 points per family (range: 0 to -0.30). -0.90 (total) | - | Not implemented |
|                                                                                | <b>4K.</b> Variant IS found in another individual in the proband's family <b>UNAFFECTED</b> with the nonspecific phenotype observed in the proband.                       | -0.15 points per family (range: 0 to -0.15). -0.30 (total) | - | Not implemented |

|                                      |                                                                                                                                                                        |                                                                |    |                 |
|--------------------------------------|------------------------------------------------------------------------------------------------------------------------------------------------------------------------|----------------------------------------------------------------|----|-----------------|
| Case-control and population evidence | <b>4L.</b> Statistically significant increase amongst observations in cases (with a consistent, specific, well-defined phenotype) compared with controls.              | 0.45 per study (range: 0 to 0.45 per study). 0.45 (total)      | -  | Not implemented |
|                                      | <b>4M.</b> Statistically significant increase amongst observations in cases (without a consistent, nonspecific phenotype OR unknown phenotype) compared with controls. | 0.30 per study (range: 0 to 0.30 per study). 0.45 (total)      | -  | Not implemented |
|                                      | <b>4N.</b> No statistically significant difference between observations in cases and controls.                                                                         | -0.90 (per study) (range: 0 to -0.90 per study). -0.90 (total) | -  | Not implemented |
|                                      | <b>4O.</b> Overlap with common population variation.                                                                                                                   | -1 (range: 0 to -1)                                            | -1 | Implemented     |

**Section 5: Evaluation of inheritance pattern/family history for patient being studied**

|                                        |                                                                                                                                                     |                                                                                         |   |                 |
|----------------------------------------|-----------------------------------------------------------------------------------------------------------------------------------------------------|-----------------------------------------------------------------------------------------|---|-----------------|
| Observed copy-number gain is de novo   | <b>5A.</b> Use appropriate category from de novo scoring section in section 4.                                                                      | Use de novo scoring categories from section 4 (4A-4D) to determine score (0.45 max)     | - | Not implemented |
| Observed copy-number loss is inherited | <b>5B.</b> Patient with specific, well-defined phenotype and no family history. Copy-number gain is inherited from an apparently unaffected parent. | -0.30 (range: 0 to -0.45)                                                               | - | Not implemented |
|                                        | <b>5C.</b> Patient with nonspecific phenotype and no family history. Copy-number gain is inherited from an apparently unaffected parent.            | -0.15 (range: 0 to -0.30)                                                               | - | Not implemented |
|                                        | <b>5D.</b> CNV segregates with consistent phenotype observed in the patient's family.                                                               | Use segregation scoring categories from section 4 (4F-4H) to determine score (0.45 max) | - | Not implemented |

|                                             |                                                                                                                                                                            |                                                                                             |   |                 |
|---------------------------------------------|----------------------------------------------------------------------------------------------------------------------------------------------------------------------------|---------------------------------------------------------------------------------------------|---|-----------------|
| Observed copy-number gain — nonsegregations | <b>5E.</b> Use appropriate category from nonsegregation section in section 4.                                                                                              | Use nonsegregation scoring categories from section 4 (4I–4K) to determine score (–0.45 max) | - | Not implemented |
|                                             | <b>5F.</b> Inheritance information is unavailable or uninformative.                                                                                                        | 0                                                                                           | - | Not implemented |
|                                             | <b>5G.</b> Inheritance information is unavailable or uninformative. The patient phenotype is nonspecific, but is consistent with what has been described in similar cases. | 0.10 (range: 0 to 0.15)                                                                     | - | Not implemented |
|                                             | <b>5H.</b> Inheritance information is unavailable or uninformative. The patient phenotype is highly specific and consistent with what has been described in similar cases. | 0.15 (range: 0 to 0.30)                                                                     | - | Not implemented |

Supplementary Table S4. Comparison of ClassifyCNV calls to the results of manual annotation by ACMG/Clingen. All coordinates are hg19. For 76% of the variants, ClassifyCNV matched the ACMG/Clingen category exactly. For an additional 5% of the variants, ClassifyCNV called a variant likely benign or likely pathogenic, while the ACMG/ClinGen evaluation determined the variant to be benign or pathogenic, respectively.

| Chromosome | Start position | End position | CNV type | ACMG/ClinGen Evaluator 1 | ACMG/ClinGen Evaluator 2 | Conflict in ACMG/Clingen evaluation | ClassifyCNV classification | Classify CNV score |
|------------|----------------|--------------|----------|--------------------------|--------------------------|-------------------------------------|----------------------------|--------------------|
| 1          | 247,815,979    | 248,609,997  | DEL      | Likely Benign            | Likely Benign            |                                     | Uncertain                  | 0.45               |
| 3          | 12,630,912     | 12,818,103   | DUP      | Benign                   | Likely Benign            |                                     | Uncertain                  | 0                  |
| 7          | 33,347,521     | 33,580,567   | DEL      | Benign                   | Likely Benign            |                                     | Uncertain                  | 0                  |
| 13         | 23,533,358     | 24,958,572   | DUP      | Benign                   | Likely Benign            |                                     | Uncertain                  | 0                  |
| 16         | 6,819,602      | 7,026,403    | DEL      | Benign                   | Benign                   |                                     | Uncertain                  | 0.15               |
| 20         | 14,928,598     | 15,134,187   | DEL      | Benign                   | Likely Benign            |                                     | Uncertain                  | 0                  |
| X          | 2,766,830      | 2,800,818    | DEL      | Benign                   | Benign                   |                                     | Benign                     | -1                 |
| X          | 6,455,151      | 8,135,644    | DUP      | Likely Benign            | Benign                   |                                     | Benign                     | -1                 |
| 1          | 146,500,972    | 147,828,089  | DEL      | Pathogenic               | Pathogenic               |                                     | Pathogenic                 | 1                  |
| 2          | 51,002,928     | 51,512,609   | DEL      | Not Completed            | Pathogenic               |                                     | Likely pathogenic          | 0.9                |
| 2          | 200,197,135    | 200,242,625  | DEL      | Pathogenic               | Pathogenic               |                                     | Uncertain                  | 0                  |
| 2          | 215,772,556    | 220,450,837  | DUP      | Likely Pathogenic        | Likely Pathogenic        |                                     | Likely pathogenic          | 0.9                |
| 2          | 231,309,745    | 242,783,384  | DEL      | Pathogenic               | Pathogenic               |                                     | Pathogenic                 | >1                 |
| 10         | 4,646,926      | 47,531,169   | DUP      | Pathogenic               | Pathogenic               |                                     | Likely pathogenic          | 0.9                |
| 10         | 26,524,127     | 30,285,671   | DEL      | Pathogenic               | Pathogenic               |                                     | Pathogenic                 | 1                  |
| 10         | 89,653,447     | 89,693,702   | DEL      | Pathogenic               | Pathogenic               |                                     | Likely pathogenic          | 0.9                |
| 12         | 116,533,732    | 116,632,392  | DUP      | Likely Pathogenic        | Likely Pathogenic        |                                     | Uncertain                  | 0                  |
| 13         | 39,428,367     | 43,608,103   | DEL      | Pathogenic               | Likely Pathogenic        |                                     | Uncertain                  | 0.15               |
| 13         | 101,956,482    | 102,666,953  | DEL      | Likely Pathogenic        | Likely Pathogenic        |                                     | Uncertain                  | 0                  |
| 14         | 101,354,421    | 101,489,161  | DEL      | Benign                   | Likely Pathogenic        | yes                                 | Uncertain                  | 0                  |
| 15         | 31,073,735     | 32,446,830   | DEL      | Pathogenic               | Pathogenic               |                                     | Pathogenic                 | 1                  |
| 15         | 37,287,175     | 37,788,218   | DEL      | Pathogenic               | Pathogenic               |                                     | Uncertain                  | 0.15               |
| 15         | 74,398,119     | 76,053,391   | DUP      | Pathogenic               | Pathogenic               |                                     | Uncertain                  | 0.45               |
| 16         | 3,878,449      | 4,046,709    | DEL      | Pathogenic               | Pathogenic               |                                     | Likely pathogenic          | 0.9                |
| 16         | 15,509,406     | 16,312,952   | DUP      | Likely Benign            | Pathogenic               | yes                                 | Uncertain                  | 0                  |
| 16         | 15,492,307     | 16,041,598   | DEL      | Pathogenic               | Likely Pathogenic        |                                     | Uncertain                  | 0.15               |
| 16         | 29,517,698     | 30,177,240   | DUP      | Pathogenic               | Likely Pathogenic        |                                     | Uncertain                  | 0                  |
| 16         | 29,567,295     | 30,226,930   | DEL      | Pathogenic               | Pathogenic               |                                     | Pathogenic                 | >1                 |
| 16         | 50,031,502     | 51,518,183   | DEL      | Pathogenic               | Pathogenic               |                                     | Pathogenic                 | >1                 |
| 18         | 53,290,008     | 53,383,013   | DEL      | Pathogenic               | Likely Pathogenic        |                                     | Uncertain                  | 0                  |
| 22         | 18,661,724     | 21,561,514   | DUP      | Pathogenic               | Pathogenic               |                                     | Pathogenic                 | >1                 |

|    |             |             |     |                   |                   |     |                   |      |
|----|-------------|-------------|-----|-------------------|-------------------|-----|-------------------|------|
| X  | 6,449,752   | 8,135,644   | DEL | Pathogenic        | Pathogenic        |     | Pathogenic        | 1    |
| X  | 102,857,802 | 103,135,921 | DUP | Pathogenic        | Pathogenic        |     | Pathogenic        | 1    |
| 1  | 11,938,131  | 15,167,547  | DEL | Uncertain         | Uncertain         |     | Likely pathogenic | 0.9  |
| 1  | 158,461,562 | 159,002,778 | DEL | Uncertain         | Not Completed     |     | Uncertain         | 0    |
| 1  | 174,191,836 | 174,957,575 | DEL | Uncertain         | Uncertain         |     | Uncertain         | 0    |
| 2  | 12,770      | 1,522,939   | DEL | Uncertain         | Uncertain         |     | Uncertain         | 0    |
| 2  | 2,143,654   | 2,204,279   | DEL | Benign            | Uncertain         | yes | Uncertain         | 0    |
| 2  | 9,558,552   | 10,930,819  | DEL | Uncertain         | Uncertain         |     | Uncertain         | 0    |
| 2  | 47,433,147  | 47,827,310  | DUP | Uncertain         | Uncertain         |     | Uncertain         | 0    |
| 2  | 57,641,400  | 60,339,585  | DEL | Uncertain         | Uncertain         |     | Uncertain         | 0    |
| 2  | 106,878,800 | 108,518,292 | DUP | Likely Benign     | Uncertain         | yes | Uncertain         | 0    |
| 2  | 111,388,618 | 113,127,751 | DEL | Pathogenic        | Uncertain         | yes | Uncertain         | 0    |
| 2  | 149,218,583 | 149,933,863 | DUP | Uncertain         | Likely Pathogenic | yes | Uncertain         | 0    |
| 3  | 10,833,963  | 11,406,520  | DEL | Uncertain         | Likely Pathogenic | yes | Pathogenic        | 1    |
| 3  | 13,019,290  | 13,847,073  | DUP | Uncertain         | Uncertain         |     | Uncertain         | 0    |
| 3  | 24,331,917  | 24,453,796  | DEL | Uncertain         | Uncertain         |     | Uncertain         | 0.15 |
| 3  | 76,434,692  | 79,133,755  | DEL | Uncertain         | Uncertain         |     | Uncertain         | 0.15 |
| 3  | 123,042,165 | 123,477,576 | DUP | Uncertain         | Uncertain         |     | Uncertain         | 0    |
| 3  | 136,422,030 | 137,892,515 | DEL | Uncertain         | Not Completed     |     | Uncertain         | 0.15 |
| 4  | 190,131,512 | 190,957,473 | DEL | Likely Benign     | Uncertain         | yes | Uncertain         | 0    |
| 5  | 36,961,572  | 37,789,193  | DUP | Uncertain         | Pathogenic        | yes | Uncertain         | 0    |
| 5  | 107,249,962 | 108,344,036 | DUP | Uncertain         | Uncertain         |     | Uncertain         | 0    |
| 5  | 127,739,699 | 127,871,574 | DEL | Likely Pathogenic | Uncertain         | yes | Uncertain         | 0    |
| 5  | 178,291,553 | 179,343,716 | DUP | Uncertain         | Uncertain         |     | Uncertain         | 0    |
| 6  | 16,524,862  | 16,671,871  | DEL | Uncertain         | Uncertain         |     | Uncertain         | 0    |
| 6  | 80,573,500  | 83,983,729  | DUP | Likely Pathogenic | Uncertain         | yes | Uncertain         | 0    |
| 6  | 126,419,160 | 128,801,386 | DEL | Uncertain         | Uncertain         |     | Uncertain         | 0.15 |
| 6  | 170,575,101 | 170,881,749 | DUP | Uncertain         | Uncertain         |     | Uncertain         | 0    |
| 7  | 70,039,743  | 70,188,336  | DUP | Pathogenic        | Uncertain         | yes | Uncertain         | 0    |
| 7  | 73,774,057  | 74,613,903  | DEL | Uncertain         | Likely Pathogenic | yes | Uncertain         | 0    |
| 7  | 83,782,434  | 84,876,096  | DUP | Uncertain         | Uncertain         |     | Uncertain         | 0    |
| 7  | 153,700,272 | 155,224,288 | DEL | Uncertain         | Pathogenic        | yes | Uncertain         | 0    |
| 8  | 3,571,948   | 4,900,891   | DUP | Uncertain         | Benign            | yes | Uncertain         | 0    |
| 8  | 62,538,732  | 65,591,265  | DUP | Uncertain         | Uncertain         |     | Uncertain         | 0    |
| 9  | 203,861     | 378,086     | DEL | Benign            | Uncertain         | yes | Uncertain         | 0    |
| 9  | 4,947,509   | 5,712,780   | DEL | Uncertain         | Uncertain         |     | Uncertain         | 0.15 |
| 9  | 6,704,474   | 10,486,872  | DUP | Uncertain         | Uncertain         |     | Uncertain         | 0    |
| 9  | 36,360,269  | 36,950,301  | DUP | Uncertain         | Uncertain         |     | Uncertain         | 0    |
| 9  | 104,940,824 | 105,845,122 | DEL | Uncertain         | Uncertain         |     | Uncertain         | 0    |
| 9  | 118,602,947 | 121,246,861 | DEL | Uncertain         | Uncertain         |     | Uncertain         | 0.15 |
| 9  | 140,573,688 | 140,685,407 | DUP | Uncertain         | Pathogenic        | yes | Uncertain         | 0    |
| 10 | 81,603,169  | 81,976,925  | DEL | Uncertain         | Uncertain         |     | Uncertain         | 0    |
| 11 | 31,409,742  | 31,679,570  | DEL | Uncertain         | Uncertain         |     | Uncertain         | 0    |
| 11 | 55,030,214  | 55,386,217  | DEL | Benign            | Uncertain         | yes | Uncertain         | 0    |

|    |             |             |     |                   |                   |     |                   |      |
|----|-------------|-------------|-----|-------------------|-------------------|-----|-------------------|------|
| 11 | 102,948,591 | 103,694,905 | DUP | Uncertain         | Uncertain         |     | Uncertain         | 0    |
| 11 | 126,297,655 | 127,275,723 | DUP | Uncertain         | Uncertain         |     | Uncertain         | 0    |
| 12 | 1,740,520   | 3,600,867   | DUP | Uncertain         | Uncertain         |     | Uncertain         | 0    |
| 12 | 62,290,628  | 63,836,571  | DEL | Uncertain         | Uncertain         |     | Uncertain         | 0.15 |
| 12 | 112,844,056 | 113,841,611 | DUP | Likely Pathogenic | Uncertain         | yes | Uncertain         | 0    |
| 13 | 20,808,574  | 21,475,963  | DEL | Uncertain         | Uncertain         |     | Uncertain         | 0    |
| 13 | 22,952,407  | 25,406,588  | DUP | Uncertain         | Uncertain         |     | Uncertain         | 0    |
| 13 | 32,943,827  | 32,945,580  | DUP | Uncertain         | Uncertain         |     | Uncertain         | 0    |
| 14 | 24,080,270  | 24,631,608  | DUP | Uncertain         | Uncertain         |     | Uncertain         | 0    |
| 14 | 77,935,939  | 78,636,492  | DUP | Uncertain         | Uncertain         |     | Uncertain         | 0    |
| 14 | 84,325,247  | 89,218,538  | DEL | Uncertain         | Likely Benign     | yes | Uncertain         | 0    |
| 14 | 93,710,666  | 93,935,402  | DEL | Uncertain         | Uncertain         |     | Uncertain         | 0    |
| 15 | 24,487,787  | 25,171,720  | DUP | Pathogenic        | Uncertain         | yes | Uncertain         | 0    |
| 15 | 28,958,779  | 30,370,018  | DEL | Uncertain         | Pathogenic        | yes | Uncertain         | 0.15 |
| 15 | 63,244,929  | 63,841,049  | DEL | Uncertain         | Uncertain         |     | Uncertain         | 0    |
| 15 | 79,694,215  | 80,368,818  | DUP | Uncertain         | Uncertain         |     | Uncertain         | 0    |
| 15 | 93,510,242  | 96,199,396  | DEL | Uncertain         | Likely Pathogenic | yes | Likely pathogenic | 0.9  |
| 15 | 100,692,803 | 102,260,994 | DUP | Uncertain         | Uncertain         |     | Uncertain         | 0    |
| 16 | 14,594,908  | 14,766,618  | DUP | Uncertain         | Pathogenic        | yes | Uncertain         | 0    |
| 16 | 28,819,028  | 29,051,191  | DUP | Uncertain         | Uncertain         |     | Uncertain         | 0    |
| 16 | 29,802,654  | 30,177,240  | DUP | Uncertain         | Likely Pathogenic | yes | Uncertain         | 0    |
| 16 | 46,503,192  | 49,658,927  | DEL | Uncertain         | Uncertain         |     | Uncertain         | 0.15 |
| 16 | 89,727,432  | 89,886,148  | DUP | Uncertain         | Uncertain         |     | Uncertain         | 0    |
| 17 | 7,448,219   | 7,573,899   | DUP | Uncertain         | Uncertain         |     | Uncertain         | 0    |
| 17 | 29,681,300  | 29,768,428  | DUP | Uncertain         | Uncertain         |     | Uncertain         | 0    |
| 17 | 41,258,421  | 41,258,605  | DEL | Uncertain         | Likely Pathogenic | yes | Uncertain         | 0    |
| 17 | 41,258,421  | 41,258,605  | DUP | Likely Pathogenic | Uncertain         | yes | Uncertain         | 0    |
| 17 | 41,784,108  | 42,438,203  | DUP | Uncertain         | Uncertain         |     | Uncertain         | 0    |
| 18 | 2,821,972   | 3,412,357   | DUP | Uncertain         | Uncertain         |     | Uncertain         | 0    |
| 18 | 47,093,759  | 47,449,144  | DUP | Uncertain         | Uncertain         |     | Uncertain         | 0    |
| 19 | 1,204,812   | 1,226,846   | DUP | Uncertain         | Uncertain         |     | Uncertain         | 0    |
| 19 | 2,349,974   | 2,940,906   | DUP | Uncertain         | Uncertain         |     | Uncertain         | 0    |
| 19 | 47,482,403  | 48,177,720  | DEL | Uncertain         | Likely Pathogenic | yes | Uncertain         | 0.15 |
| 20 | 14,618,195  | 14,744,154  | DEL | Uncertain         | Uncertain         |     | Uncertain         | 0    |
| 22 | 20,109,547  | 21,290,949  | DUP | Likely Pathogenic | Uncertain         | yes | Uncertain         | 0    |
| X  | 1,519,902   | 2,140,501   | DUP | Uncertain         | Uncertain         |     | Uncertain         | 0    |
| X  | 1,734,397   | 4,958,582   | DUP | Uncertain         | Uncertain         |     | Uncertain         | 0    |
| X  | 10,149,642  | 10,830,236  | DUP | Uncertain         | Uncertain         |     | Uncertain         | 0    |
| X  | 103,033,744 | 103,288,063 | DUP | Pathogenic        | Uncertain         | yes | Uncertain         | 0    |

## References

1. O'Leary, N. A. *et al.* Reference sequence (RefSeq) database at NCBI: current status, taxonomic expansion, and functional annotation. *Nucleic Acids Res.* **44**, D733–45 (2016).
2. Visel, A., Minovitsky, S., Dubchak, I. & Pennacchio, L. A. VISTA Enhancer Browser--a database of tissue-specific human enhancers. *Nucleic Acids Res.* **35**, D88–92 (2007).
3. Andersson, R. *et al.* An atlas of active enhancers across human cell types and tissues. *Nature* **507**, 455–461 (2014).
4. Zerbino, D. R., Wilder, S. P., Johnson, N., Juettemann, T. & Flicek, P. R. The ensembl regulatory build. *Genome Biol.* **16**, 56 (2015).
5. Kuhn, R. M., Haussler, D. & Kent, W. J. The UCSC genome browser and associated tools. *Brief. Bioinform.* **14**, 144–161 (2013).
6. Rehm, H. L. *et al.* ClinGen--the Clinical Genome Resource. *N. Engl. J. Med.* **372**, 2235–2242 (2015).
7. Firth, H. V. *et al.* DECIPHER: Database of Chromosomal Imbalance and Phenotype in Humans Using Ensembl Resources. *Am. J. Hum. Genet.* **84**, 524–533 (2009).
8. Lek, M. *et al.* Analysis of protein-coding genetic variation in 60,706 humans. *Nature* **536**, 285–291 (2016).
9. Collins, R. L. *et al.* A structural variation reference for medical and population genetics. *Nature* **581**, 444–451 (2020).
10. MacDonald, J. R., Ziman, R., Yuen, R. K. C., Feuk, L. & Scherer, S. W. The Database of Genomic Variants: a curated collection of structural variation in the human genome. *Nucleic Acids Res.* **42**, D986–92 (2014).
